# Supplementary material for: PP2A activation alone and in combination with cisplatin decreases cell growth and tumor formation in human HuH6 hepatoblastoma cells
Source: PLOS journal article supplement (doi:10.1371/journal.pone.0214469), 2019-04-10
Supplement: S2 (10.1371/journal.pone.0214469.s002) [file journal.pone.0214469.s002]

## S2 Fig

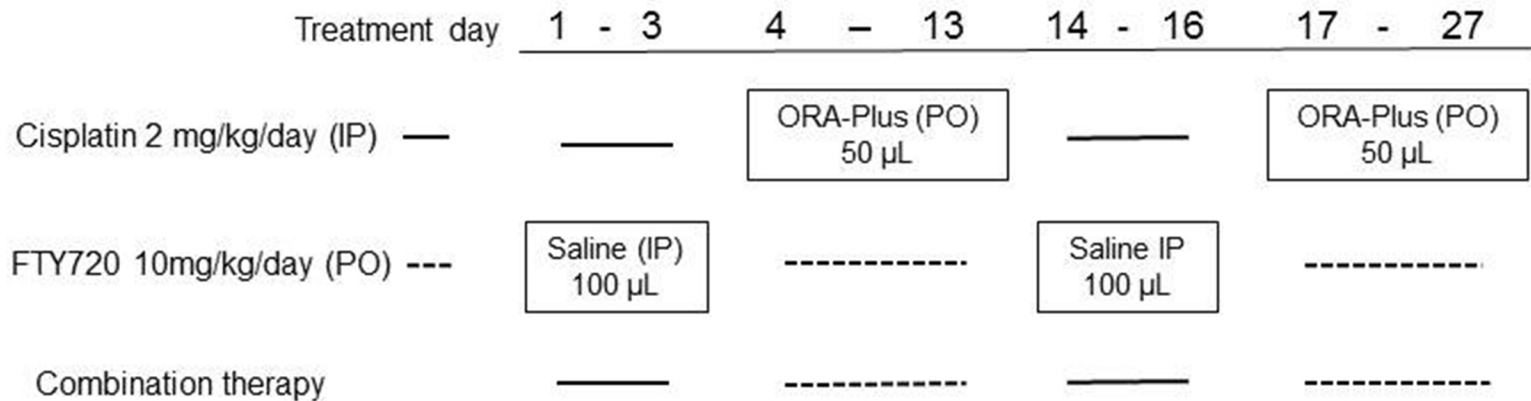

S2 Fig Treatment scheme for *in vivo* combination of FTY720 and cisplatin. Cisplatin (solid line) was administered by intraperitoneal injection on days 1-3 and 14-16 to mice in the cisplatin alone and combination therapy groups. For the FTY720 alone group, mice received sterile saline by intraperitoneal injection on days 1-3 and 14-16. On days 4-13 and 17-27, FTY720 in ORA-Plus® (dashed line) was administered by oral gavage to the FTY720 alone and combination therapy groups. For the cisplatin alone group, mice received ORA-Plus® by oral gavage on days 4-13 and 17-27.
